# Supplementary material for: An excellent thermostable dual-functionalized 3D fsx-type Cd(ii) MOF for the highly selective detection of Fe3+ ions and ten nitroaromatic explosives
Source: Royal Society of Chemistry journal article supplement (doi:10.1039/d1ce00939g), 2021-01-01
Supplement: d1ce00939g1.pdf [file d1ce00939g1.pdf]

## Electronic Supplementary Material (ESI)

### **An excellent thermostable dual-functionalized 3D *fsx*-type Cd(II) MOF for highly selective detection of Fe<sup>3+</sup> ions and ten nitroaromatic explosives**

Gui-Lin Wen<sup>a,\*</sup>, Wei-Ping Wu<sup>b,\*</sup>, Feng-Wu Wang<sup>a</sup>, Dao-Fu Liu<sup>a</sup>, Xiao-Ling Wang<sup>a</sup>,  
Jie-Wei Rong<sup>a</sup>, Yao-Yu Wang<sup>c</sup>

<sup>a</sup>School of Chemistry and Materials Engineering, Huainan Engineering Research Center for Fuel Cells, Anhui Province Key Laboratory of Low Temperature Co-fired Materials, Huainan Normal University, Huainan 232038, P. R. China

<sup>b</sup>College of Chemistry and Environmental Engineering, Sichuan University of Science & Engineering, Zigong 643000, P. R. China

<sup>c</sup>Key Laboratory of Synthetic and Natural Functional Molecule Chemistry of the Ministry of Education, Shaanxi Key Laboratory of Physico-Inorganic Chemistry, College of Chemistry & Materials Science, Northwest University, Xi'an 710069, P. R. China

\*Corresponding author:

E-mail: guilinwen@126.com (G.-L. Wen); wuweipingzg@126.com (W.-P. Wu)

Tel / Fax:: +86-554-6672637, +86-813-5506935

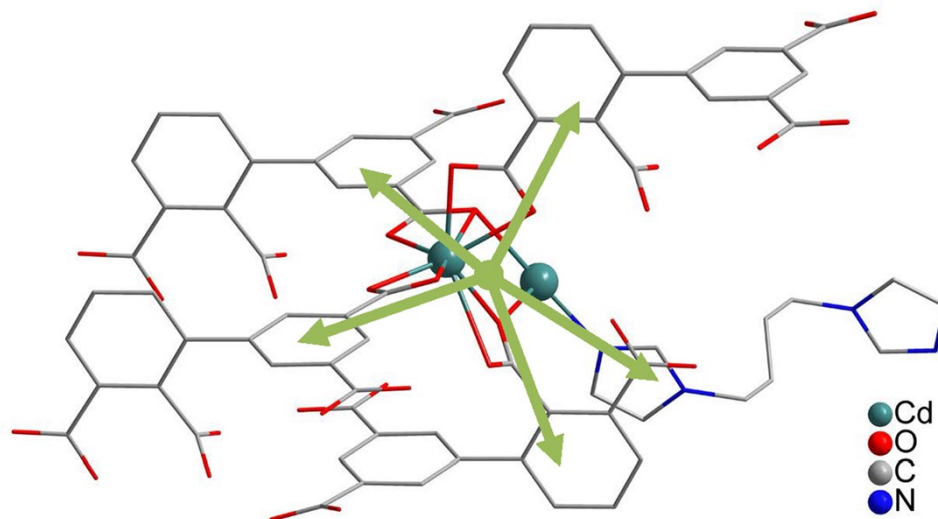

(a)

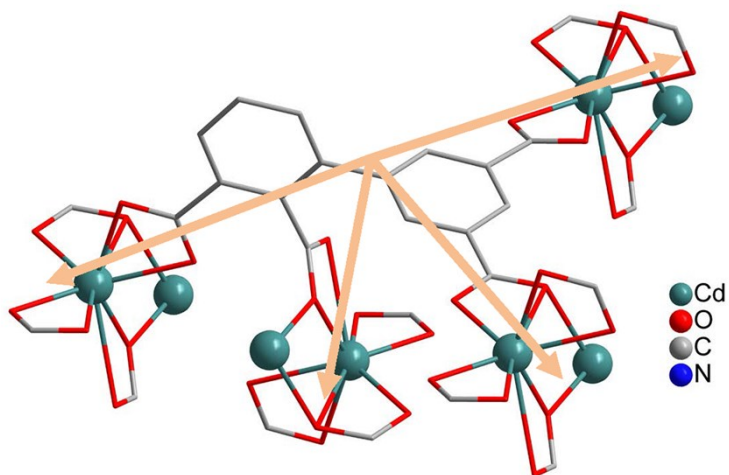

(b)

**Fig. S1** Simplified nodes of metal clusters (a) and H<sub>4</sub>L ligand (b) observed in MOF-1.

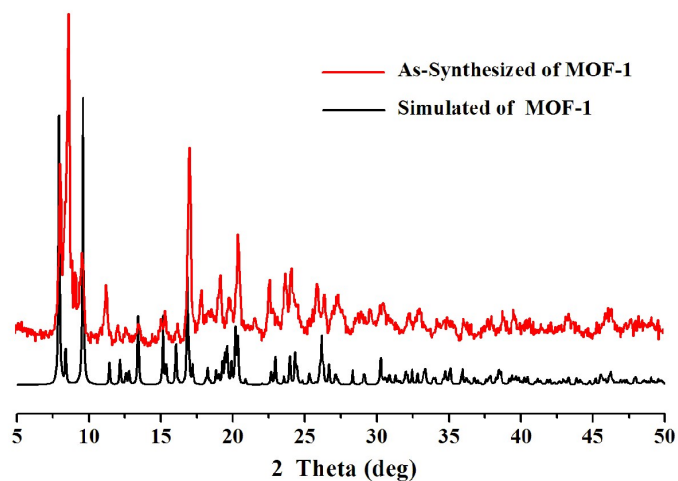

**Fig. S2** PXRD patterns from the single-crystal simulated and as-synthesized powders of MOF-1.

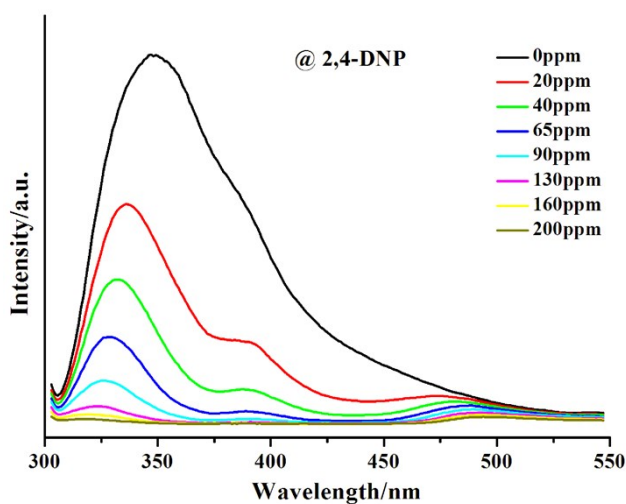

(a)

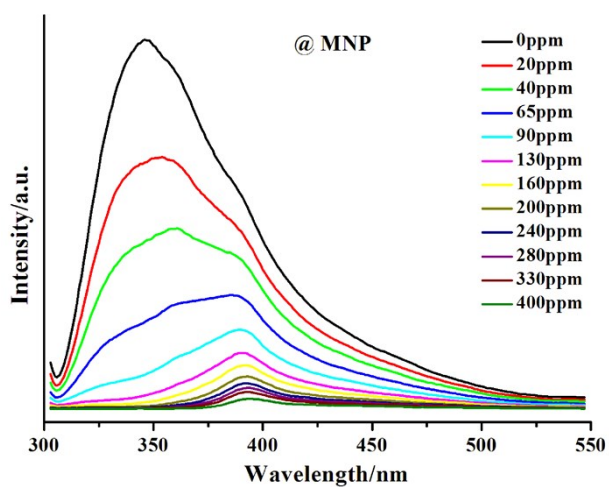

(b)

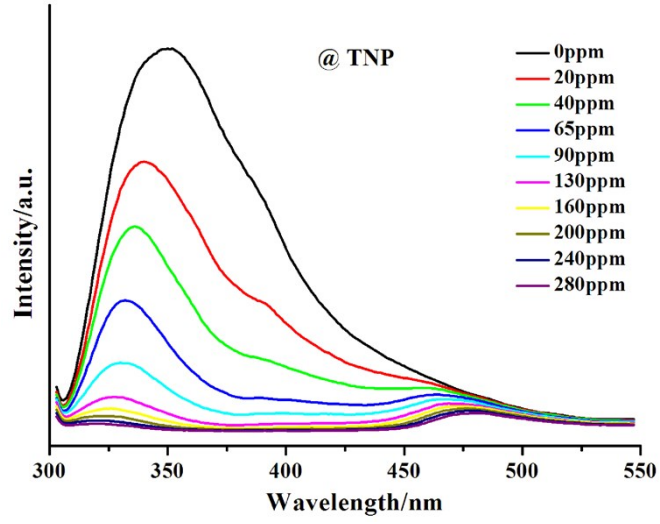

(c)

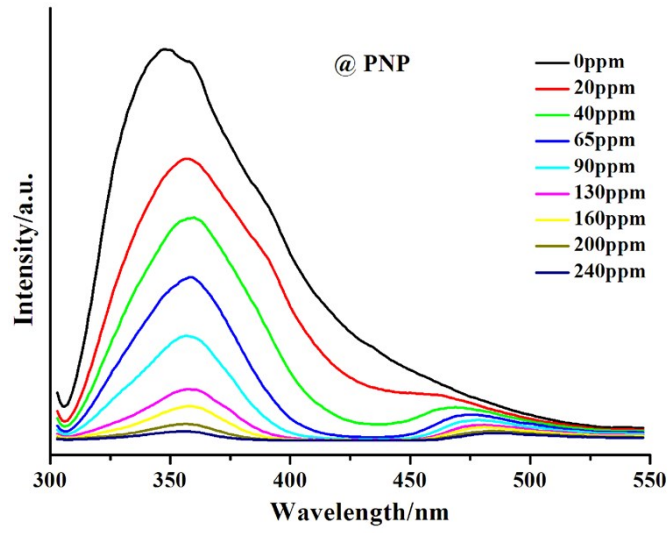

(d)

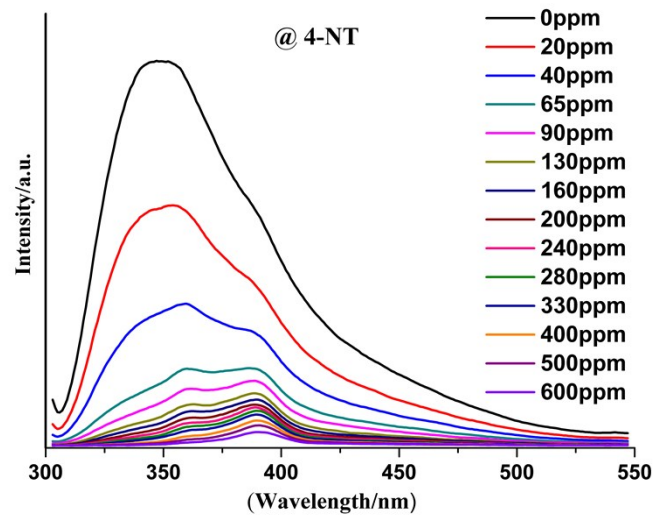

(e)

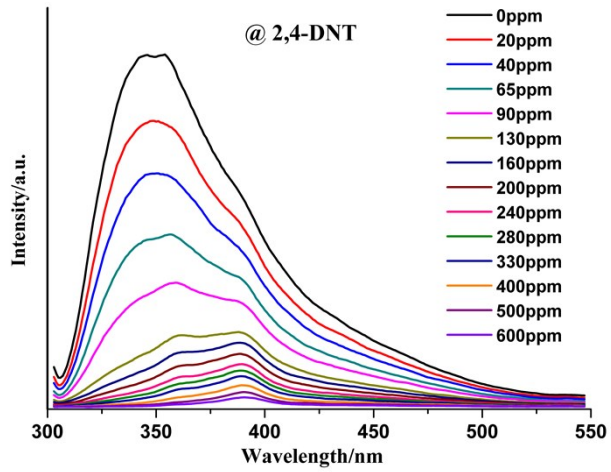

(f)

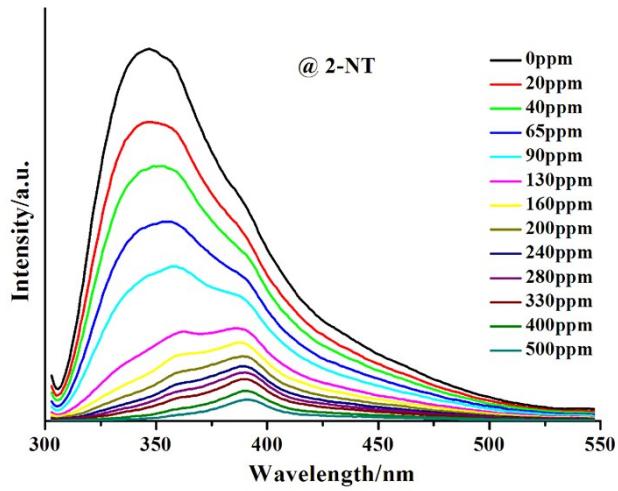

(g)

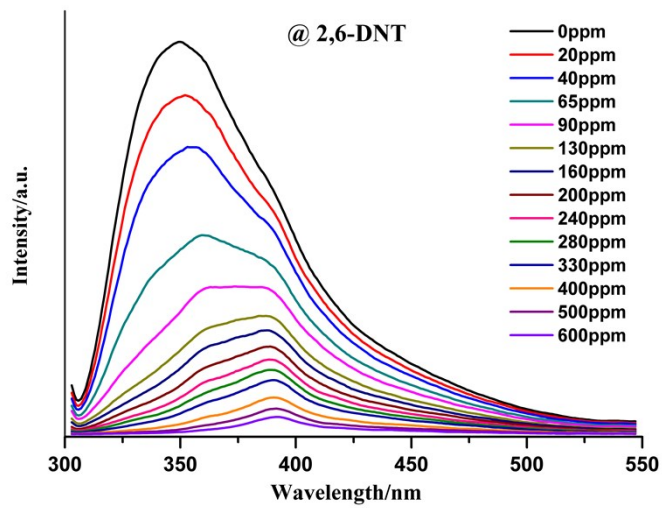

(h)

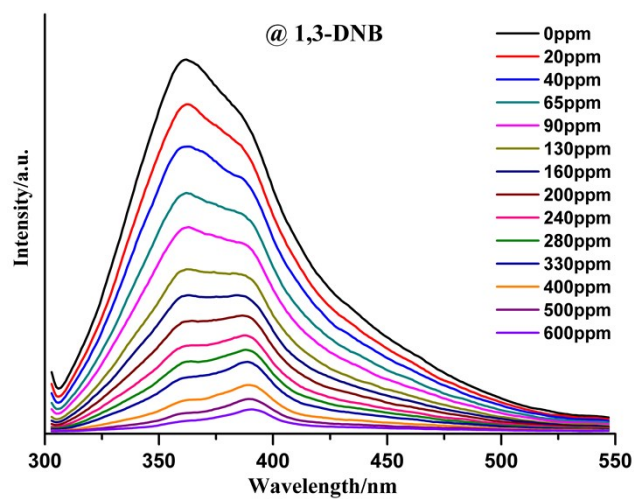

(i)

**Fig. S3** Luminescence spectra of MOF-1 upon the incremental addition of nitroaromatic explosives: (a) 2,4-DNP, (b) MNP, (c) TNP, (d) PNP, (e) 4-NT, (f) 2,4-DNT, (g) 2-NT, (h) 2,6-DNT, (i) 1,3-DNB.

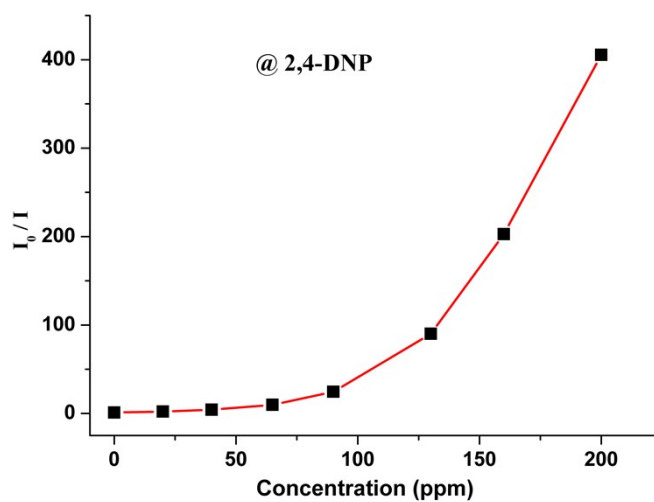

(a)

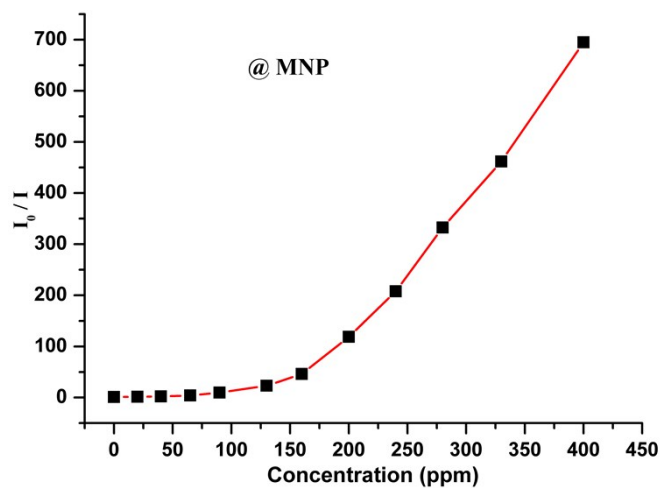

(b)

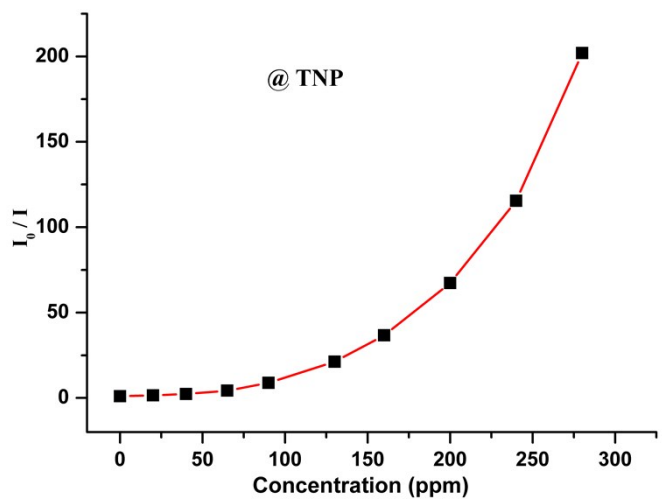

(c)

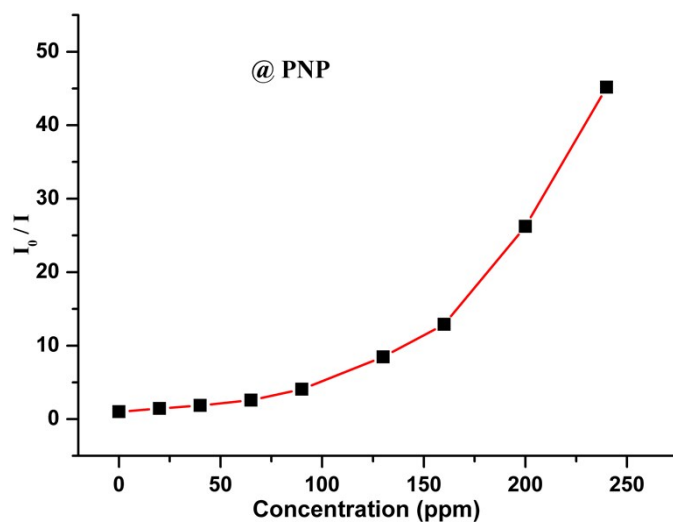

(d)

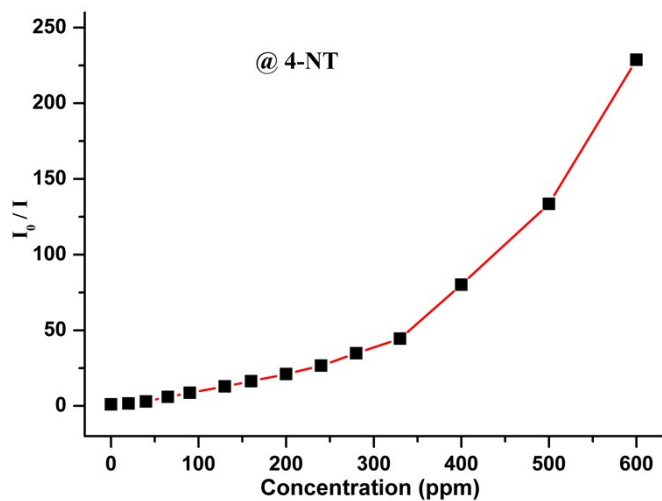

(e)

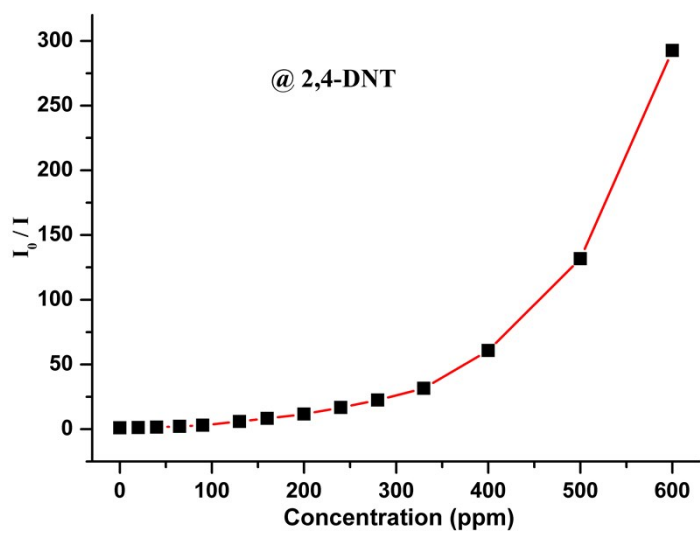

(f)

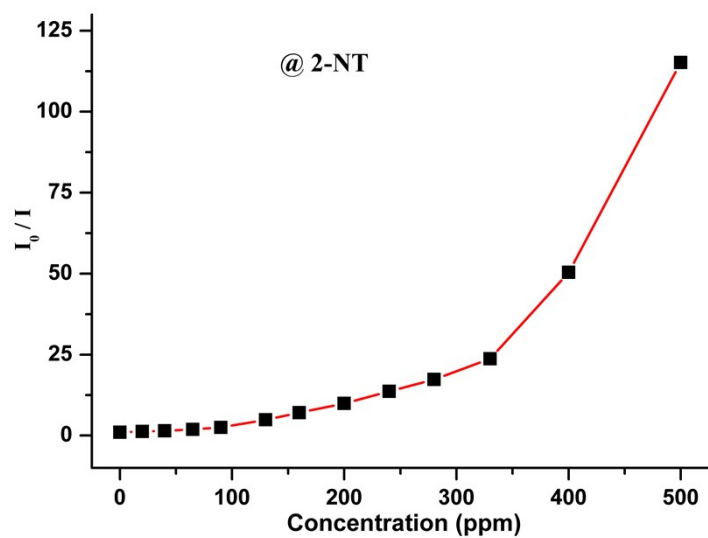

(g)



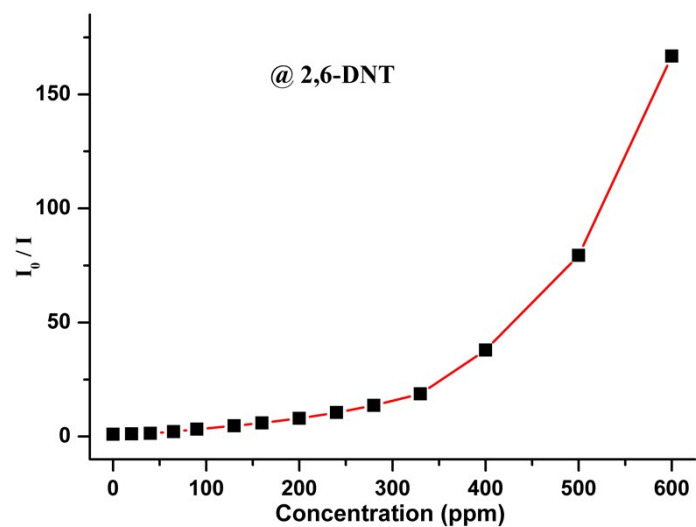

(h)

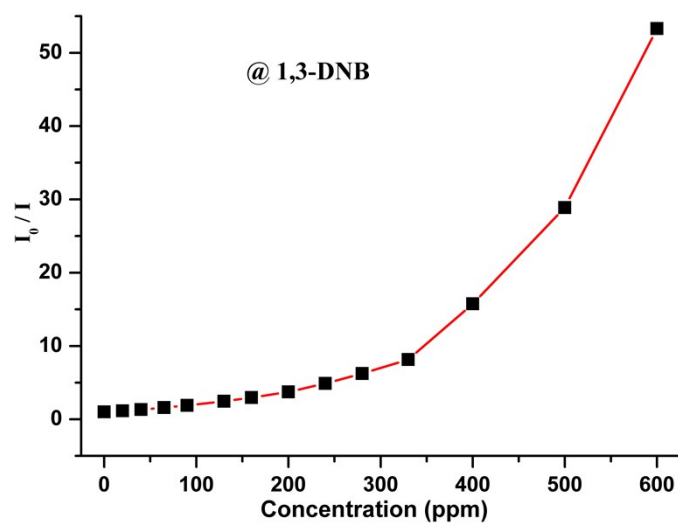

(i)

**Fig. 4** The correlation between  $I_0/I$  vs  $[C]$  concentration of different nitroaromatic explosives: (a) 2,4-DNP, (b) MNP, (c) TNP, (d) PNP, (e) 4-NT, (f) 2,4-DNT, (g) 2-NT, (h) 2,6-DNT, (i) 1,3-DNB.

**Table S1.** Selected bond lengths (Å) and angles (°) of MOF-1 <sup>[a]</sup>.

|               |            |               |            |
|---------------|------------|---------------|------------|
| Cd1-O1        | 2.353(3)   | Cd1-O5#2      | 2.316(3)   |
| Cd1-O2        | 2.382(2)   | Cd1-O7#1      | 2.258(2)   |
| Cd1-O3#3      | 2.314(3)   | Cd2-N1        | 2.232(4)   |
| Cd2-O3        | 2.274(3)   | Cd2-O6#4      | 2.346(3)   |
| Cd2-O9        | 2.264(3)   | Cd2-O10       | 2.331(3)   |
| Cd2-O11       | 2.272(3)   |               |            |
| O1-Cd1-O2     | 55.27(9)   | O3#3-Cd1-O1   | 141.83(9)  |
| O3#3-Cd1-O2   | 90.08(9)   | O3#3-Cd1-O5#2 | 91.87(10)  |
| O5#2-Cd1-O2   | 126.71(9)  | O5#2-Cd1-O1   | 96.90(10)  |
| O7#1-Cd1-O1   | 97.32(10)  | O7#1-Cd1-O2   | 133.21(10) |
| O7#1-Cd1-O3#3 | 119.83(9)  | O7#1-Cd1-O5#2 | 89.99(9)   |
| O3-Cd2-O6#4   | 78.32(9)   | O3-Cd2-O10    | 169.91(12) |
| O9-Cd2-O3     | 89.79(10)  | O9-Cd2-O6#4   | 77.67(10)  |
| O9-Cd2-O10    | 84.99(13)  | O9-Cd2-O11    | 159.95(12) |
| O10-Cd2-O6#4  | 92.12(13)  | O11-Cd2-O6#4  | 86.83(13)  |
| O11-Cd2-O3    | 99.54(11)  | O11-Cd2-O10   | 82.94(13)  |
| N1-Cd2-O3     | 103.40(11) | N1-Cd2-O6#4   | 178.20(11) |
| N1-Cd2-O9     | 101.71(13) | N1-Cd2-O10    | 86.14(15)  |
| N1-Cd2-O11    | 93.40(15)  |               |            |

<sup>[a]</sup> Symmetry codes: #1 x, y, z+1; #2 x-1, y, z+1; #3 -x+1, -y+1, -z+1; #4 -x+2, -y+1, -z.

**Table S2.** Standard deviation ( $\delta$ ) calculation for MOF-1 in different solvent systems.

|       | Luminescence intensity test of MOF-1 |        |        |        |        | Average value | Standard deviation |
|-------|--------------------------------------|--------|--------|--------|--------|---------------|--------------------|
|       | 1                                    | 2      | 3      | 4      | 5      |               |                    |
| Water | 784.63                               | 785.10 | 784.26 | 783.97 | 784.88 | 784.57        | 0.46               |
| DMF   | 791.28                               | 790.08 | 790.56 | 791.44 | 790.92 | 790.86        | 0.55               |

**Table S3.** The luminous intensities and quenching effects of MOF-1 at 200 ppm concentration of different nitroaromatic explosives.

|         | Luminous intensity before quenching / a.u. | Luminous intensity after quenching / a.u. | Quenching efficiency / % |
|---------|--------------------------------------------|-------------------------------------------|--------------------------|
| 2,4-DNP | 811.36                                     | 1.80                                      | 99.78                    |
| MNP     | 830.67                                     | 7.34                                      | 99.12                    |
| TNP     | 807.68                                     | 11.96                                     | 98.52                    |
| PNP     | 812.72                                     | 31.32                                     | 96.15                    |
| 4-NT    | 800.56                                     | 37.96                                     | 95.26                    |
| 2,4-DNT | 789.80                                     | 68.12                                     | 91.38                    |
| NB      | 791.28                                     | 76.35                                     | 90.35                    |
| 2-NT    | 806.46                                     | 80.80                                     | 89.97                    |
| 2,6-DNT | 834.35                                     | 104.57                                    | 87.47                    |
| 1,3-DNB | 693.24                                     | 185.46                                    | 73.25                    |
